# Supplementary material
Source: publisher figshare collection journal article supplement (https://acs.figshare.com/ndownloader/files/5625627)
Supplement: Supplementary file 1 [file 5625627]

## Supplemental Information for:

### **Vapor-dissociation-solid Growth of 3D Graphite-like Capsules with Delicate Morphology and Atomic-level Thickness Control**

Xian Jian<sup>a,b,ζ</sup>, Guozhang Chen<sup>a,ζ</sup>, Hongyang Liu<sup>c,ζ</sup>, Nasir Mahmood<sup>b</sup>, Shibu Zhu<sup>d</sup>, Liangjun Yin<sup>a</sup>,  
Hui Tang<sup>a</sup>, Weiqiang Lv<sup>a</sup>, Weidong He<sup>a,\*</sup>, Kelvin H.L. Zhang<sup>e</sup>, Qun Zeng<sup>f,\*</sup>, Baihai Li<sup>a</sup>, Xuesong  
Li<sup>g</sup>, Wanli Zhang<sup>g,\*</sup> and Xiaolin Wang<sup>b,\*</sup>

<sup>a</sup> Center of Micro-Nano Functional Materials and Devices, School of Energy Science and  
Engineering, University of Electronic Science and Technology of China, Chengdu, 611731,  
China

<sup>b</sup> Institute for Superconducting and Electronic Materials, Australian Institute for Innovative  
Materials, University of Wollongong, North Wollongong, 2500, Australia

<sup>c</sup> Shenyang National Laboratory for Materials Science, Institute of Metal Research, Chinese  
Academy of Sciences, Shenyang, 110016, China

<sup>d</sup> Xi'an Aerospace Composites Research Institute, Xi'an, 710025, China

<sup>e</sup> Department of Materials Science & Metallurgy, University of Cambridge, 27 Charles  
Babbage Road, Cambridge, UK CB3 0FS, United Kingdom

<sup>f</sup> Institute of Chemical Materials, China Academy of Engineering Physics, Mianyang, 621900,  
China

<sup>g</sup> State key Laboratory of Electronic Thin Films and Integrated Devices, Institute of  
Microelectronic & solid-state electronics, University of Electronic Science and Technology of  
China, Chengdu, 610054, China

---

<sup>ζ</sup> Xian Jian, Guozhang Chen and Hongyang Liu contributed equally to this work.

\* Corresponding authors. Email addresses: weidong.he@uestc.edu.cn (W. He),  
zq84229@163.com (Q. Zeng), wlzhang@uestc.edu.cn (W. Zhang) and xiaolin@uow.edu.cn (X.  
Wang).

## Experimental Details:

Graphite-like Capsules (GCs) over various materials are synthesized on metal oxides including  $\text{TiO}_2$ ,  $\text{ZnO}$ ,  $\text{SnO}_2$  and  $\text{BaFe}_{12}\text{O}_9$  through the CCVD method. The main synthetic process is depicted in the Experiment Section of the manuscript. The preparation of  $\text{TiO}_2@\text{CC}$  is carried out at 700 °C for 5 S (Figure 1a) and 30 min (Figure 1b) with an acetylene flow of 20 mL/min without nitrogen (the following case is similar).  $\text{ZnO}@\text{GCs}$  is synthesized at 400 -800 °C under 50 mL/min acetylene. For ZnO nanorod, the temperature is controlled at 400 °C for 1 min (Figure 1c). For T-ZnO, the reaction condition is 800 °C for 60 min (Figure 1d). The  $\text{SnO}_2@\text{GCs}$  is prepared at 500 °C for 10 min under 30 mL/min acetylene (Figure 1e).  $\text{BaFe}_{12}\text{O}_9@\text{GCs}$  is prepared from the decomposition of acetylene (40 mL/min) at 400 °C for 5 min (Figure 1f).

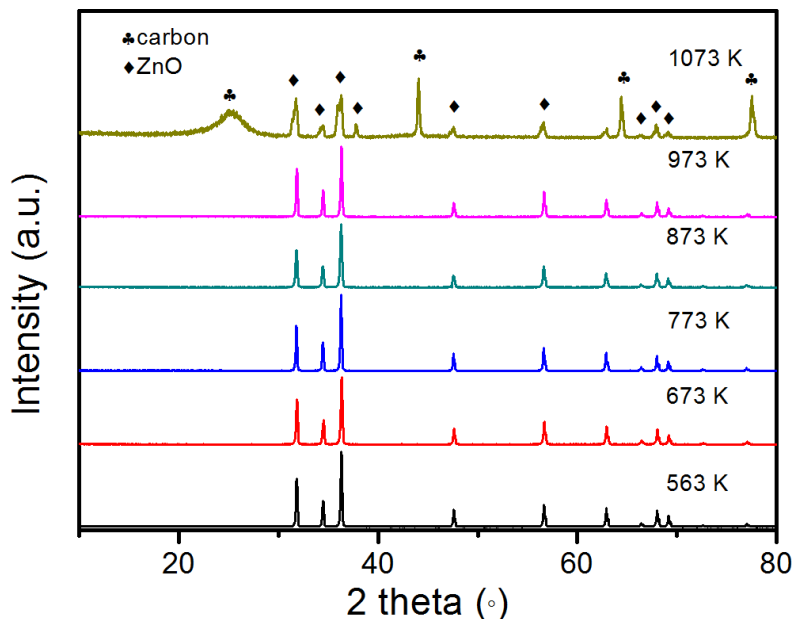

Figure S1. XRD data of carbon capsule hybridize T-ZnO at different reaction temperatures for 60 min under a 50 mL/min  $\text{C}_2\text{H}_2$  flow.

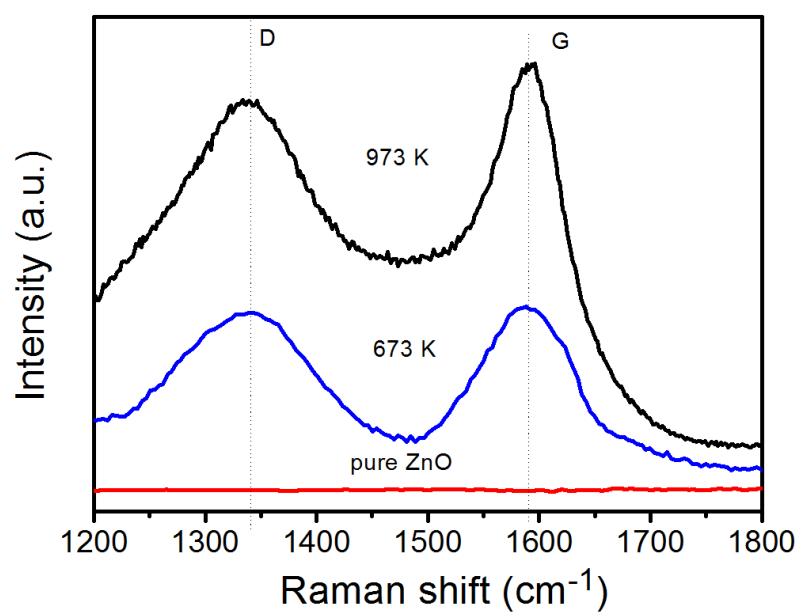

Figure S2. Raman spectra of pure T-ZnO and T-ZnO@GCs obtained at different reaction temperatures for 60 min under a 50 mL/min C<sub>2</sub>H<sub>2</sub> flow.
